# Supplementary material
Source: publisher figshare collection journal article supplement (https://future-science-group.figshare.com/ndownloader/files/33989696)
Supplement: Supplementary file 1 [file 33989696]

# Supplementary Material

**Supplemental Figure 1. Overall Survival from the Index Date, Patients Treated with a *BRAF* Therapy in the Index Line or Prior to Index**

Abbreviations: *BRAF* = B-Raf proto-oncogene, serine/threonine kinase; CI = confidence interval; mt = mutation; OS = overall survival

Note: The index date was the date of disease progression on the index anti-PD-1 line of therapy
